# Supplementary material for: Joint Trajectories of Peer Aggression and Peer Victimization in Chinese Early Adolescents: Relations to Internalization Problems and Suicidal Ideation
Source: Research Square preprint supplement (doi:10.21203/rs.3.rs-4753244/v1), 2024-08-19

**Online Supplemental Materials for**

**Joint Trajectories of Peer Aggression and Peer Victimization in Chinese Early Adolescents: Relations to Internalization Problems and Suicidal Ideation**

**List of Contents**

[**Table S1** 2](#_Toc143592036)

[**Table S2** 3](#_Toc143592037)

**Table S1**

Descriptive statistics for the variables by time points.

|  | Time1 M(SD) | Time2 M(SD) | Time3 M(SD) | Time4 M(SD) | Time5  M(SD) | Time6 M(SD) |
| --- | --- | --- | --- | --- | --- | --- |
| Physical aggression | 0.22 (2.98) | 0.18 (3.42) | 0.23 (2.75) | 0.18 (3.02) | 0.17 (3.13) | 0.14 (3.38) |
| Relational aggression | 0.18 (3.53) | 0.15 (3.92) | 0.14 (3.92) | 0.12 (4.30) | 0.11 (4.45) | 0.09 (5.18) |
| Physical victimization | 0.69 (1.15) | 0.57 (1.35) | 0.63 (1.20) | 0.56 (1.39) | 0.52 (1.45) | 0.44 (1.67) |
| Relational victimization | 0.56 (1.46) | 0.44 (1.87) | 0.48 (1.62) | 0.43 (1.89) | 0.40 (2.07) | 0.35 (2.19) |

**Figure S1**

The schematic diagram of the accelerated longitudinal design.


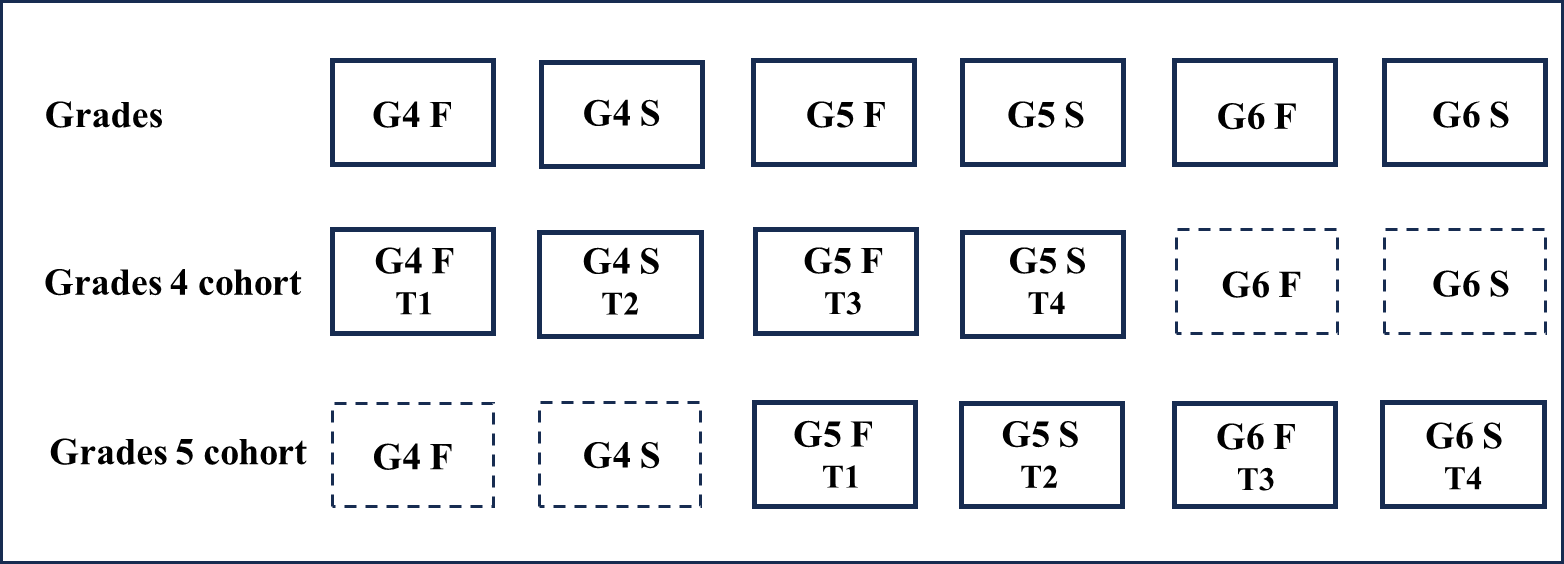

Supplement: Supplementary file 1 [file c90bd1125b1a876cff89792c.docx]
